# Supplementary material
Source: MDPI journal article supplement (https://www.mdpi.com/2076-0760/7/2/22)
Supplement: s1 [file s1]

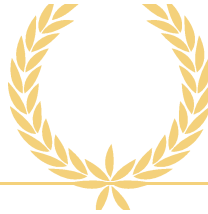

We certify that the following article

Impact of organizational influences on project performance and outcome,  
through its life cycle

Masoumeh Ghazinejad, Bassam Hussein, Youcef Zidane \*

has undergone English language editing by MDPI. The text has been checked for correct use of grammar and common technical terms, and edited to a level suitable for reporting research in a scholarly journal.

MDPI uses experienced, native English speaking editors. Full details of the editing service can be found at

► [www.mdpi.com/authors/english](http://www.mdpi.com/authors/english).

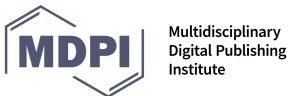

Basel, January 2018

A handwritten signature in blue ink, consisting of a series of loops and a long horizontal stroke, positioned above a horizontal gold line.

Martyn Rittman, Ph.D.  
English Editing Manager
